# Supplementary material for: The Gut Dysbiosis and Immune System in Atherosclerotic Cardiovascular Disease (ACVD)
Source: Preprints.org preprint supplement (doi:10.20944/preprints202111.0175.v1), 2021-11-09
Supplement: Supplementary file 1 [file supplementary]

| Subjects       | Gut Microbiota Taxonomy                                                                                                                                                                                                                         | TMAO level changes, consequences, and proposed mechanisms                                                                                                                                                                                                                                                                                                                                                                                                                                                                                                                                                                                                                                                                                                                                                                                                                                                                                                                                                                                                                                                                                                                                                                                  | Reference                                                    |
|----------------|-------------------------------------------------------------------------------------------------------------------------------------------------------------------------------------------------------------------------------------------------|--------------------------------------------------------------------------------------------------------------------------------------------------------------------------------------------------------------------------------------------------------------------------------------------------------------------------------------------------------------------------------------------------------------------------------------------------------------------------------------------------------------------------------------------------------------------------------------------------------------------------------------------------------------------------------------------------------------------------------------------------------------------------------------------------------------------------------------------------------------------------------------------------------------------------------------------------------------------------------------------------------------------------------------------------------------------------------------------------------------------------------------------------------------------------------------------------------------------------------------------|--------------------------------------------------------------|
| Human          | <p>↑ <i>Lactobacillus ruminus</i> with Stroke</p> <p>Ischemic stroke independently associated with: ↑ <i>Atopobium</i> cluster</p> <p>↑ <i>L. ruminus</i></p> <p>↓ <i>L. sakei</i></p> <p>T2D associated with:</p> <p>↓ <i>C. coccoides</i></p> | <p>↑ <i>L. ruminis</i> → ↑ inflammation in stroke patients (↑ IL-6)</p> <p>Ischemic stroke → ↓ acetic acid + ↑ valeric acid</p> <p>↓ acetic acid → ↑ HbA1c + LDL cholesterol</p> <p>↑ valeric acid → ↑ CRP + leukocyte counts</p> <p>↓ <i>C. coccoides</i> → ↑ HbA1c + ↑ LDL cholesterol + ↑ CRP + IL-6</p>                                                                                                                                                                                                                                                                                                                                                                                                                                                                                                                                                                                                                                                                                                                                                                                                                                                                                                                                | 1) Yamashiro et al., 2017, PLOS One                          |
| Human and Mice | <p><i>Desulfovibrio desulfuricans</i> degrades choline → TMA via choline-specific TMA lyase cutC/D</p> <p><i>Acinetobacter baumannii</i>: degrades carnitine → TMA via carnitine-specific TMA lyase cntA/B</p>                                  | <p><u>In humans:</u></p> <p>↑ circulating carnitine, choline, or betaine (dietary precursors to TMA/TMAO) → ↑ risk of myocardial infarction, stroke, or death independent of traditional risk factors, but only when ↑ TMAO levels</p> <p>↑ plasma choline, ↑ betaine, + ↑ TMAO → phosphatidylcholine (PC) metabolism</p> <p><u>In mouse models:</u></p> <p>Dietary exposure to TMA or precursors → ↓ Reverse cholesterol transport (RCT), alteration in cholesterol + sterol metabolic pathways</p> <p>↑ Dietary L-carnitine → ↑ atherosclerosis pathogenesis when gut microbiota intact</p> <p>So, ↓ direct TMA precursor/substrate consumption or modifying gut microbial composition → ↓ ability to produce TMA</p>                                                                                                                                                                                                                                                                                                                                                                                                                                                                                                                    | 2) Tang & Hazen, 2014, The Journal of Clinical Investigation |
| Human and Mice | None                                                                                                                                                                                                                                            | <p><u>In humans:</u></p> <p>↑ Plasma levels of choline, TMAO and betaine → ↑ atherosclerosis risk</p> <p><u>In atherosclerosis prone (C57BL/6J Apoe<sup>-/-</sup>) mice:</u></p> <p>↑ dietary choline, TMAO, + betaine → ↑ ACVD lesion area + ↑ CD36 + SR-A1 in macrophages</p> <p>↑ dietary choline and TMAO → minimal change in plasma choline, ↑ plasma TMAO levels</p> <p>↑ plasma levels of TMAO → ↑ aortic lesion size</p> <p>↑ dietary choline → ↑ lipid-laden macrophage development</p> <p>↑ hepatic FMO3 expression → ↑ atherosclerotic lesion formation, ↓ HDL cholesterol, + ↑ plasma TMAO</p> <p><u>In atherosclerosis prone mice given antibiotics:</u></p> <p>Admin of d9-PC or d9-choline ≠ ↑ plasma TMAO, but restored when reintroduced to normal mice</p> <p>↑ dietary choline ≠ ↑ macrophage foam cell formation or ↑ atherosclerosis or ↑ CD36 expression</p> <p>Choline supplementation promotes macrophage foam cell formation in a gut-flora-dependent fashion</p> <p><u>In germ free mice:</u></p> <p>Admin of d9-PC or d9-choline ≠ ↑ plasma TMAO but restored when reintroduced to normal mice</p> <p><u>Identified pathway:</u></p> <p>dietary PC/choline → gut-flora-formed TMA → hepatic-FMO-formed TMAO</p> | 3) Wang et al., 2011, Nature                                 |
| Human and      | <u>In humans:</u>                                                                                                                                                                                                                               | <u>In humans:</u>                                                                                                                                                                                                                                                                                                                                                                                                                                                                                                                                                                                                                                                                                                                                                                                                                                                                                                                                                                                                                                                                                                                                                                                                                          | 4) Koeth et al., 2013,                                       |

|       |                                                                                                                                                                                                                                                                                                                                                                                                                                                                                                                                                                                                                                                                                                                                                   |                                                                                                                                                                                                                                                                                                                                                                                                                                                                                                                                                                                                                                                                                                                                                                                                                                                                                                                                                                                                                                                                                                                                                                                                                                                                                                                                                                                                                                                                                                                                                                                                                                                                    |                                            |
|-------|---------------------------------------------------------------------------------------------------------------------------------------------------------------------------------------------------------------------------------------------------------------------------------------------------------------------------------------------------------------------------------------------------------------------------------------------------------------------------------------------------------------------------------------------------------------------------------------------------------------------------------------------------------------------------------------------------------------------------------------------------|--------------------------------------------------------------------------------------------------------------------------------------------------------------------------------------------------------------------------------------------------------------------------------------------------------------------------------------------------------------------------------------------------------------------------------------------------------------------------------------------------------------------------------------------------------------------------------------------------------------------------------------------------------------------------------------------------------------------------------------------------------------------------------------------------------------------------------------------------------------------------------------------------------------------------------------------------------------------------------------------------------------------------------------------------------------------------------------------------------------------------------------------------------------------------------------------------------------------------------------------------------------------------------------------------------------------------------------------------------------------------------------------------------------------------------------------------------------------------------------------------------------------------------------------------------------------------------------------------------------------------------------------------------------------|--------------------------------------------|
| Mice  | <p>↑ <i>Bacteroides</i> → ↑ plasma TMAO<br/> ↑ <i>Prevotella</i> → ↑↑ plasma TMAO</p> <p>Vegans (compared to omnivores) + ↓ TMAO → ↓ <i>Clostridiaceae</i>, ↓ <i>Peptostreptococcaceae incertae sedis</i>, ↓ <i>Peptostreptococcaceae</i>, ↓ <i>Clostridium</i>, + ↑ <i>Lachnospira</i></p> <p><u>In mice:</u><br/> ↑ dietary carnitine + ↑ TMA → ↑ <i>Prevotella</i> + ↑ <i>Prevotellaceae Unclassified</i><br/> ↑ dietary carnitine + ↑ TMAO → ↑ <i>Anaeroplasm</i> + ↓ <i>Porphyromonadaceae</i></p>                                                                                                                                                                                                                                           | <p>↑ fasting plasma [carnitine] → ↑ risk of coronary artery disease, peripheral artery disease, and overall CVD</p> <p>↑ fasting plasma [carnitine] → ↑ risk of major adverse cardiac events only when no adjustment made for TMAO</p> <p>Vegetarian and vegan fasting TMAO levels &lt; omnivore fasting TMAO levels<br/> Vegetarianism/veganism → ↓ dietary l-carnitine or choline → ↓ capacity for synthesis of TMAO from l-carnitine → ↓ TMAO levels → ↓ CVD<br/> Omnivores → ↑ dietary l-carnitine → ↑ capacity for synthesis of TMAO from l-carnitine → ↑ atherosclerosis</p> <p><u>In Apoe -/- mice:</u><br/> ↑ dietary l-carnitine → ↑ plasma carnitine, ↑ production of TMA + TMAO, + ↑↑ disease burden<br/> ↑ dietary l-carnitine or ↑ dietary choline → ↓ RCT compared to normal chow-fed controls<br/> TMAO-containing diet → 35% ↓ in RCT compared to normal chow-fed controls<br/> Dietary TMAO supplement → ↓ mRNA hepatic levels of key bile acid synthetic enzymes Cyp7a1 and Cyp27a1 +<br/> ↓ bile acid transporter expression (Oatp1, Oatp4, Mrp2, Ntcp) in the liver, but not the gut, + ↓ total bile acid pool size</p> <p>Antibiotics + ↑ dietary l-carnitine → ↓ plasma TMA and TMAO levels + complete ↓ dietary l-carnitine-dependent increase in atherosclerosis, but ↑ plasma carnitine concentrations<br/> Antibiotics + ↑ dietary l-carnitine or ↑ dietary choline ≠ ↓ RCT compared to normal chow-fed controls</p> <p>So, microbial composition changes → changes in TMAO synthetic capacity → altered sterol metabolism<br/> Also, TMAO, rather than carnitine = primary driver of the correlation between carnitine and CVD risk</p> | Nature Medicine                            |
| Human | <p><u>In humans with ACVD:</u><br/> ↑ <i>Streptococcus</i>, ↑ <i>Escherichia</i>, ↓ <i>Bacteroides</i>,<br/> ↓ <i>Prevotella</i>, ↓ <i>Alistipes shahii</i>,<br/> ↑ <i>Enterobacteriaceae</i> (<i>Escherichia coli</i>, <i>Klebsiella</i> spp., and <i>Enterobacter aerogenes</i>),<br/> ↑ <i>Streptococcus</i> spp., ↑ <i>Lactobacillus salivarius</i>, ↑ <i>Solobacterium moorei</i>, ↑ <i>Atopobium parvulum</i> ↑ <i>Ruminococcus gnavus</i> ↑ <i>Eggerthella lenta</i> ↑<br/> ↓ butyrate-producing bacteria<br/> (<i>Roseburia intestinalis</i> and <i>Faecalibacterium cf. prausnitzii</i>)<br/> ↑ an unclassified <i>Erysipelotrichaceae</i> bacterium, <i>C. nexile</i>, + <i>S. anginosus</i> encode CutC → ↑ TMA synthetic capacity</p> | <p><u>In ACVD patients:</u><br/> Metagenomic linkage groups differentially enriched in people with versus without ACVD</p> <p>Gut microbiome showed ↑ potential for transport of simple sugars (phosphotransferase systems) and amino acids, but ↓ potential for biosynthesis of most vitamins, ↓ potential for the synthesis of tetrahydrofolate, changed potential for homocysteine metabolism, ↓ potential for metabolizing glycans (e.g. glycosaminoglycans), ↑ potential for metabolism of glycerolipids and degradation of fatty acids, ↓ potential for synthesis of anti-inflammatory butyrate,<br/> ↓ module involved in propionate synthesis, ↑ Gut microbial enzymes involved in formation of TMA</p> <p>↑ <i>Enterobacteriaceae</i> in ACVD → ↑ gene module for synthesis of the O-antigen of LPS<br/> ↓ gram-negative genus <i>Bacteroides</i> → ↓ lipid A synthesis module</p> <p>Alterations in gut microbial functional modules in ACVD and other disease included phosphotransferase transport systems, amino acid transporters, vitamin metabolism, and LPS biosynthesis.</p> <p>Cardiometabolomic disease ↔ ↓ fermentative + ↑ inflammation of the gut microbiome</p>                                                                                                                                                                                                                                                                                                                                                                                                                                                                            | 5) Jie et al., 2017, Nature Communications |

|                                                                                                                      |                                                                                                                                                                                                                                                                                                                                                                                                                                                                                                                                                                                                                                                                                                                                    |                                                                                                                                                                                                                                                                                                                                                                                                                                                                                                                                                                                                                                                                                                                                                                                                                                                                                                                                                                                                                                                                                                                                                                                                                                                                                                                                                                                                                                                                                                                                                                                                                                                                                                   |
|----------------------------------------------------------------------------------------------------------------------|------------------------------------------------------------------------------------------------------------------------------------------------------------------------------------------------------------------------------------------------------------------------------------------------------------------------------------------------------------------------------------------------------------------------------------------------------------------------------------------------------------------------------------------------------------------------------------------------------------------------------------------------------------------------------------------------------------------------------------|---------------------------------------------------------------------------------------------------------------------------------------------------------------------------------------------------------------------------------------------------------------------------------------------------------------------------------------------------------------------------------------------------------------------------------------------------------------------------------------------------------------------------------------------------------------------------------------------------------------------------------------------------------------------------------------------------------------------------------------------------------------------------------------------------------------------------------------------------------------------------------------------------------------------------------------------------------------------------------------------------------------------------------------------------------------------------------------------------------------------------------------------------------------------------------------------------------------------------------------------------------------------------------------------------------------------------------------------------------------------------------------------------------------------------------------------------------------------------------------------------------------------------------------------------------------------------------------------------------------------------------------------------------------------------------------------------|
| <p>↑ <i>E. aerogenes</i> and <i>Klebsiella pneumoniae</i> encode the TMA lyase YeaW/X → ↑ TMA synthetic capacity</p> |                                                                                                                                                                                                                                                                                                                                                                                                                                                                                                                                                                                                                                                                                                                                    |                                                                                                                                                                                                                                                                                                                                                                                                                                                                                                                                                                                                                                                                                                                                                                                                                                                                                                                                                                                                                                                                                                                                                                                                                                                                                                                                                                                                                                                                                                                                                                                                                                                                                                   |
| Mice                                                                                                                 | n/a                                                                                                                                                                                                                                                                                                                                                                                                                                                                                                                                                                                                                                                                                                                                | <p>In transintestinal cholesterol excretion mouse models, FMO3 gene ↓ → regulator of RCT</p> <p>FMO3 antisense oligonucleotide (ASO) treatment → no change in overall health of mice, ↓ hepatic cholesteryl ester levels, ↓ hepatic FMO3 mRNA and protein expression compared to nontargeting control ASO → ↑ TMA + ↓ TMAO</p> <p>FMO3 ASO treatment → ↓↓ intestinal cholesterol absorption, + ↑ fecal neutral sterol loss in low-cholesterol diet mice + ↓ cholesterol absorption, ↓ VLDL cholesterol levels, ↑ LDL cholesterol levels, but no change in fecal sterol loss in high-cholesterol diet mice</p> <p>So, knockdown (KD) of FMO3 → reorganization of cholesterol balance in a diet-specific manner, suggesting a link between FMO3 and cholesterol and BA metabolism.</p> <p>FMO3 KD → ↓ expression of oxysterol synthetic enzymes Cyp27a1 + Cyp46a1 → ↓ availability of endogenous oxysterol ligands in liver → ↑ SREBP2-driven transcription and ↓ LXR signaling</p> <p>FMO3 KD → ↓ total plasma cholesterol levels, ↑ basal + ↑ LXR agonist-stimulated macrophage RCT, but ↓ biliary cholesterol levels + ↓ intestinal cholesterol absorption</p> <p>FMO3 KD → ↓ LXR activation → ↑ activation of c-Src, ↑ hepatic ER stress (↑ ATF3, CHOP) + inflammation (↑ infiltration of macrophages into the liver, ↑ macrophage-derived proinflammatory cytokine + chemokine expression)</p> <p>FMO3 KD + LXR agonists → ↓ FMO3 ASO-driven hepatic inflammation, c-Src activation, + ER stress</p> <p>Even though chronic TMAO is proatherogenic, it is most likely not involved in the mechanism by which FMO3 inhibitors reorganize cholesterol balance and inflammation of the liver.</p> |
| Human, Mice, and Rat                                                                                                 | <p><u>In humans:</u></p> <p>↓ <i>Bacteroidetes:Firmicutes</i> ratio → obesity</p> <p>ACVD → ↑ <i>Collinsella</i></p> <p>Healthy controls → ↑ <i>Roseburia</i> + ↑ <i>Eubacterium</i></p> <p>↑ <i>Tenericutes</i> + ↑ <i>Christensenellaceae</i> associated with ↓ BMI, ↓ triglyceride (TG), + ↑ HDL levels → ↑ acetate (SCFA)</p> <p>↑ <i>Peptococcaceae</i>, ↑ <i>Prevotella</i>, + ↓ <i>Faecalibacterium prausnitzii</i> → ↑ TMAO</p> <p><u>In hypertensive animals:</u></p> <p>Observed ↓ microbial diversity and ↓ <i>Bacteroidetes:Firmicutes</i> ratio observed.</p> <p><u>In mice:</u></p> <p>antibiotic-induced dysbiosis → non-pathogenic <i>Salmonella enterica</i> transport to the mesenteric lymph nodes → T cell</p> | <p><u>In humans:</u></p> <p>Bacterial dysbiosis → overproduction of nitrogenous compounds → disruption of intestinal epithelial tight junctions → translocation of gut bacterial DNA and uremic toxins into circulation: e.g. atherosclerotic plaques include bacterial DNA (mostly <i>Proteobacteria</i>)</p> <p>SCFAs = signaling molecules → bind to G-protein coupled receptors GPR41 and GPR43</p> <p>SCFA bind to GPR43 → regulation of the inflammatory response: both GPR43-deficient mice and germ-free mice → ↑ production of inflammatory mediators</p> <p>SCFAs → inhibit NF-κB → ↓ inflammatory cytokine production</p> <p>Phosphatidylcholine and other TMA containing compounds (L-carnitine or choline) → metabolized by gut microbiota TMA lyases → release TMA → TMA metabolized by FMOs → produce TMAO</p> <p>Found a dose-dependent association between plasma TMAO levels and platelet aggregation</p> <p>In T2DM, ↑ TMAO levels → ↑ risk of adverse cardiovascular events and mortality, independent of glycemic control</p> <p>Fecal microbiota transplant from lean donor to insulin-resistant people with metabolic syndrome → ↑ insulin sensitivity + ↑ butyrate-producing gut bacteria</p> <p>Insulin → ↓ FMO3 expression → ↑ TMAO levels; Glucagon → ↑ FMO3 expression → ↓ TMAO levels</p> <p>↓ SCFAs → ↓ insulin sensitivity and ↓ insulin-mediated fat accumulation</p>                                                                                                                                                                                                                                                                                             |

6) Warriar et al., 2105, Cell Reports

7) Ahmadmehrabi & Tang, 2017, Curr Opin Cardiol

---

response and IgA production

In mice:

Mice on choline or TMAO supplemented diets → ↑ platelet hyperreactivity and thrombosis risk compared to germ-free mice on the same diet

KD of ↑ FMO3 → ↑ insulin tolerance, ↓ hypercholesterolemia, and ↓ atherosclerosis

↑ SCFAs in high-fat diet fed mice without changing food intake or exercise → ↓ body weight + ↑ insulin sensitivity

GPR41 receptor-deficient mice = systolic hypertensive phenotype, implying SCFA signaling reduces blood pressure

In rats:

TMAO infusion → ↑ the hypertensive effects of angiotensin II

---

Administration of DMB:

↓ the rate of intact *P. mirabilis* conversion of d9-choline → d9-TMA

↓ many bacterial taxa positively associated with TMA, TMAO, or aortic lesion area

↑ many bacterial taxa negatively associated with TMA, TMAO, or aortic lesion area

But the effect varied:

*D. alaskensis* showed ↓ inhibition

DMB = non-lethal inhibitor of *P. mirabilis*  
→ no ↓ cell growth, ↓ TMA lyase activity  
*Proteus penneri* and *Escherichia fergusonii*  
= choline TMA lyase activity

↑ DMB in cultures of *Proteus penneri* or  
*Escherichia fergusonii* → ↓ choline  
utilization → ↓ TMA, but no change in  
bacterial growth

Proportions of several taxa = aortic root  
lesion area and plasma TMA + TMAO  
E.g. In male mice, ↑ dietary choline →  
↑ *Clostridiaceae* → ↑ plasma TMA +  
TMAO, + ↑ atherosclerotic lesion area  
But ↑ dietary choline + DMB admin →  
↓ *Clostridiaceae*

E.g. In female mice,  
↑ dietary choline → ↑ *Clostridiales* → ↑  
plasma TMA + TMAO + ↑ atherosclerotic  
lesion area

But ↑ dietary choline + DMB admin →  
↓ *Clostridiales*

A choline analog, 3,3-dimethyl-1-butanol (DMB) → ↓ microbial choline TMA lyase activity

DMB → ↓ some but not all microbial TMA lyases and inhibits TMA formation from multiple substrates in physiological polymicrobial cultures

Wild type (WT) *E. coli* BL21 strain ≠ carnitine TMA lyase activity

Transformed *E. coli* cells (w/cntA or cntB from *A. baumannii*) ≠ carnitine TMA lyase activity individually

*E. coli* cells (w/cntA + cntB) → expected acquired enzymatic activity → cleaved d9-carnitine → d9-TMA

DMB = non-lethal inhibitor of TMA production by microbes

DMB → ↓ plasma TMAO levels in vivo

DMB → ↓ choline-diet-enhanced macrophage foam cell formation and ↓ atherosclerosis  
DMB ≠ effect on choline uptake by the microbes → DMB does not block choline uptake into the cells

Proves concept: ↓ microbial TMA lyase activity → ↓ microbial TMA production → potential therapeutic approach for the prevention or treatment of atherosclerosis

DMB admin, despite no significant effects on circulating cholesterol, choline, and other pro-atherogenic risk factors → ↓ choline-diet-dependent accumulation of both foam cell formation + aortic root atherosclerotic plaque development

Some DMB-induced change in microbial composition → degree of selective pressure is occurring with exposure to the agent → possibility for the development of resistance

8) Wang et al., 2015,  
Cell Press

Cultured  
Mouse  
Cecum  
Bacteria  
and Mice

|       |                                                                                                                                                                                                                                                                                                                                                                                                                                                                                                                                                                                                                                                                                                                                                    |                                                                                                                                                                                                                                                                                                                                                                                                                                                                                                                                                                                                                                                                                                                                                                                                                                                                                                                                           |                                    |
|-------|----------------------------------------------------------------------------------------------------------------------------------------------------------------------------------------------------------------------------------------------------------------------------------------------------------------------------------------------------------------------------------------------------------------------------------------------------------------------------------------------------------------------------------------------------------------------------------------------------------------------------------------------------------------------------------------------------------------------------------------------------|-------------------------------------------------------------------------------------------------------------------------------------------------------------------------------------------------------------------------------------------------------------------------------------------------------------------------------------------------------------------------------------------------------------------------------------------------------------------------------------------------------------------------------------------------------------------------------------------------------------------------------------------------------------------------------------------------------------------------------------------------------------------------------------------------------------------------------------------------------------------------------------------------------------------------------------------|------------------------------------|
|       | <p>↑ <i>Lachnospiraceae</i> + ↑ <i>Ruminococcus</i> →<br/> ↑ TMA, TMAO, + ↑ plaque area<br/> ↑ <i>Clostridiales</i> → ↑ plasma TMA levels<br/> ↑ S24-7 (<i>Bacterioidetes</i>) → ↓ TMA,<br/> ↓ trend TMAO, + ↓ ACVD plaque area</p>                                                                                                                                                                                                                                                                                                                                                                                                                                                                                                                |                                                                                                                                                                                                                                                                                                                                                                                                                                                                                                                                                                                                                                                                                                                                                                                                                                                                                                                                           |                                    |
| Human | <p>↑ <i>Klebsiella</i>, <i>Streptococcus</i>, <i>Haemophilus</i>, +<br/> <i>Granulicatella</i> in more severe CAD</p> <p>The bacterial co-abundance groups (CAGs)<br/> → age, inflammatory markers (hs-CRP and<br/> IL-18), blood lipids and dietary fiber intake</p> <p>↑ CAD → ↑ CAG17 (<i>Veillonella</i>,<br/> <i>Haemophilus</i>, + <i>Klebsiella</i>) = pathogens<br/> CAG4 (Faecalibacterium and Roseburia) =<br/> 10 serum modules → important in<br/> maintenance of normal coronary artery<br/> homeostasis</p> <p>↑ CAD development → ↓ CAGs containing<br/> OTUs from butyric acid-producing<br/> Lachnospiraceae and Ruminococcaceae</p> <p>Severe CAD → ↑ CAGs containing OTUs<br/> from Ruminococcaceae) → ↑ <i>Clostridium</i></p> | <p>Identified 29 metabolite modules associated with coronary artery disease (CAD) phenotypes<br/> Over the course of CAD, the gut microbiome composition changes dramatically, as does the metabolic<br/> phenotype</p> <p>Compared to healthy controls, CAD patients = disruptions in glucose and lipid metabolism, + ↑<br/> inflammation</p> <p>↑ CAG17 → ↑ innate immune response</p> <p>↑ CAD-associated metabolites → ↑ main risk factors of CAD, but ↓ cholesterol</p> <p>↑ phosphatidylethanolamine, PC, phosphatidylserine, and sphingolipid metabolites → ↓ AS severity and<br/> myocardial markers</p> <p>↑ Taurine + hypotaurine metabolic module → ↓ CAD severity</p> <p>↑ Aromatic compounds like bacterially produced benzenoids → disrupted CAD development</p> <p>Some bacteria may affect atherosclerosis by modulating host metabolic pathways like taurine,<br/> sphingolipid and ceramide, and benzene metabolism</p> | 9) Liu et al., 2019,<br>Microbiome |
| Mice  | <p>RSV → gut microbiota remodeling:<br/> ↑ <i>Lactobacillus</i> + ↑ <i>Bifidobacterium</i></p>                                                                                                                                                                                                                                                                                                                                                                                                                                                                                                                                                                                                                                                     | <p>Resveratrol (RSV) admin → ↓ TMAO-induced atherosclerosis in ApoE <sup>-/-</sup> mice<br/> RSV → gut microbiota remodeling → ↑ bile salt hydrolase activity → ↑ BA deconjugation and fecal<br/> excretion in C57BL/6J and ApoE <sup>-/-</sup> mice → ↓ BA in the ilea, ↓ gut-liver FXR-FGF15 axis, ↑<br/> CYP7A1 expression, and ↑ liver BA synthesis</p> <p>FXR antagonist = RSV effect on FGF15 and CYP7A1 expression<br/> FXR agonist → ↓ RSV effect on FGF15 and CYP7A1 expression</p> <p>Antibiotics → ↓ RSV inhibition of TMAO-driven atherosclerosis</p> <p>So RSV → ↓ TMA producing bacteria → ↓ TMAO, ↑ BA synthesis, mediated by FXR-FGF15 axis</p>                                                                                                                                                                                                                                                                           | 10) Chen et al, 2016,<br>mBio      |

**Table 1. The role of gut microbiota in TMA and TMAO pathways.**

↓ indicates decreasing whereas ↑ indicates increasing.
